# Supplementary material for: Perceptions of Drinking Water Service of the ‘Off-Grid’ Community in Cimahi, Indonesia
Source: MDPI journal article supplement (doi:10.3390/w13101398), 2021-05-17

## QUESTIONNAIRE

### PERCEPTIONS OF 'OFF-GRID' COMMUNITY REGARDING DRINKING WATER SUPPLY SYSTEMS IN CIMAHI CITY

| SECTION I                                                                                                                                |                                                                                                                                                                                                                                                                                                          |
|------------------------------------------------------------------------------------------------------------------------------------------|----------------------------------------------------------------------------------------------------------------------------------------------------------------------------------------------------------------------------------------------------------------------------------------------------------|
| Name of Respondents                                                                                                                      |                                                                                                                                                                                                                                                                                                          |
| Gender                                                                                                                                   | <input type="checkbox"/> Male<br><input type="checkbox"/> Female                                                                                                                                                                                                                                         |
| Age                                                                                                                                      |                                                                                                                                                                                                                                                                                                          |
| Position at the household                                                                                                                | <input type="checkbox"/> Head of household<br><input type="checkbox"/> Member of household                                                                                                                                                                                                               |
| Education                                                                                                                                | <input type="checkbox"/> Primary school <input type="checkbox"/> Junior high school <input type="checkbox"/> High school<br><input type="checkbox"/> Diploma <input type="checkbox"/> Bachelor <input type="checkbox"/> Master<br><input type="checkbox"/> Doctoral <input type="checkbox"/> Others..... |
| Occupation                                                                                                                               | <input type="checkbox"/> Civil officer <input type="checkbox"/> Entrepreneurs<br><input type="checkbox"/> Private employee <input type="checkbox"/> Stay-at-home mother/father<br><input type="checkbox"/> Labor/farmer <input type="checkbox"/> Student<br><input type="checkbox"/> Others.....         |
| Total monthly income                                                                                                                     |                                                                                                                                                                                                                                                                                                          |
| SECTION II                                                                                                                               |                                                                                                                                                                                                                                                                                                          |
| House status                                                                                                                             | <input type="checkbox"/> Privately owned<br><input type="checkbox"/> Renting<br><input type="checkbox"/> Others .....                                                                                                                                                                                    |
| Duration of staying                                                                                                                      |                                                                                                                                                                                                                                                                                                          |
| Is the source of water used for daily activities (washing, cooking, bathing, etc.) different from the source of water used for drinking? | <input type="checkbox"/> Same<br><input type="checkbox"/> Different                                                                                                                                                                                                                                      |
| The source of water used to meet water needs for daily activities (washing, cooking, bathing, etc.)?                                     | <input type="checkbox"/> Borehole<br><input type="checkbox"/> Dug well<br><input type="checkbox"/> Piped water<br><input type="checkbox"/> Water from vendors<br><input type="checkbox"/> Bottled water<br><input type="checkbox"/> Refill water                                                         |
| The source of water used to meet drinking water needs?                                                                                   | <input type="checkbox"/> Borehole<br><input type="checkbox"/> Dug well<br><input type="checkbox"/> Piped water<br><input type="checkbox"/> Water from vendors<br><input type="checkbox"/> Bottled water<br><input type="checkbox"/> Refill water                                                         |

|                                                                                                                                                                       |                                                                                                                                                                                         |
|-----------------------------------------------------------------------------------------------------------------------------------------------------------------------|-----------------------------------------------------------------------------------------------------------------------------------------------------------------------------------------|
| Prior to this research, was there ever a water supply program that was provided to the community for free?                                                            | <input type="checkbox"/> Yes<br><input type="checkbox"/> No                                                                                                                             |
| If there was a water supply program that was provided for free to the community, who provided the program?                                                            | <input type="checkbox"/> Government Program<br><input type="checkbox"/> Private Sector Program<br><input type="checkbox"/> Never                                                        |
| How much water is used to meet the needs for daily activities (washing, cooking, bathing, etc.)?                                                                      | Liter                                                                                                                                                                                   |
| How much water is used to meet the need for drinking water?                                                                                                           | Liter                                                                                                                                                                                   |
| <b>SECTION III</b>                                                                                                                                                    |                                                                                                                                                                                         |
| Can the water currently available flow throughout the day?                                                                                                            | <input type="checkbox"/> Yes <input type="checkbox"/> No                                                                                                                                |
| If water doesn't flow all day, when does water usually not flow?                                                                                                      | <input type="checkbox"/> Morning<br><input type="checkbox"/> Noon<br><input type="checkbox"/> Evening<br><input type="checkbox"/> Water flows for 24 hours                              |
| Can the water currently available be sufficient for daily water needs?                                                                                                | <input type="checkbox"/> Yes <input type="checkbox"/> No                                                                                                                                |
| What are the alternatives if the availability of water is not sufficient for daily activities (washing, cooking, bathing, etc.)?                                      | <input type="checkbox"/> Water availability is adequate<br><input type="checkbox"/> Buying more water<br><input type="checkbox"/> Storing water<br><input type="checkbox"/> Others..... |
| What do you think about the quality of water that is currently available?                                                                                             | <input type="checkbox"/> Good quality<br><input type="checkbox"/> Neutral<br><input type="checkbox"/> Poor quality                                                                      |
| Does the water used daily appear to have any color (yellowish, brownish, etc.)?                                                                                       | <input type="checkbox"/> Yes <input type="checkbox"/> No                                                                                                                                |
| Does the water used daily have a taste (bitter, salty, etc.)?                                                                                                         | <input type="checkbox"/> Yes <input type="checkbox"/> No                                                                                                                                |
| Does the water used daily have an odor (metal, sulfur, etc.)?                                                                                                         | <input type="checkbox"/> Yes <input type="checkbox"/> No                                                                                                                                |
| Have you made any efforts to improve the quality of the water available?                                                                                              | <input type="checkbox"/> Yes <input type="checkbox"/> No                                                                                                                                |
| If efforts are being made to improve water quality, what form of measures has been taken?                                                                             | <input type="checkbox"/> No efforts<br><input type="checkbox"/> Installing water filter<br><input type="checkbox"/> Applying alum to water<br><input type="checkbox"/> Others.....      |
| Are the costs incurred for obtaining water to meet daily needs (washing, cooking, bathing, etc.) considered to be burdensome for the respondent's economic condition? | <input type="checkbox"/> Yes <input type="checkbox"/> No                                                                                                                                |

|                                                                                                                             |                                                                                                                                                |                                                                                                               |                               |                               |                               |                               |                |
|-----------------------------------------------------------------------------------------------------------------------------|------------------------------------------------------------------------------------------------------------------------------------------------|---------------------------------------------------------------------------------------------------------------|-------------------------------|-------------------------------|-------------------------------|-------------------------------|----------------|
|                                                                                                                             |                                                                                                                                                |                                                                                                               |                               |                               |                               |                               |                |
| SECTION IV                                                                                                                  |                                                                                                                                                |                                                                                                               |                               |                               |                               |                               |                |
| Drinking water can be consumed without treatment                                                                            |                                                                                                                                                | <input type="checkbox"/> Correct<br><input type="checkbox"/> Incorrect<br><input type="checkbox"/> Don't know |                               |                               |                               |                               |                |
| Water quality must be tested first and meet the health requirements before it can be consumed                               |                                                                                                                                                | <input type="checkbox"/> Correct<br><input type="checkbox"/> Incorrect<br><input type="checkbox"/> Don't know |                               |                               |                               |                               |                |
| Water that is colorless, odorless, and tasteless has good quality                                                           |                                                                                                                                                | <input type="checkbox"/> Correct<br><input type="checkbox"/> Incorrect<br><input type="checkbox"/> Don't know |                               |                               |                               |                               |                |
| The quality of water used to meet daily needs does not affect human health                                                  |                                                                                                                                                | <input type="checkbox"/> Correct<br><input type="checkbox"/> Incorrect<br><input type="checkbox"/> Don't know |                               |                               |                               |                               |                |
| Various water sources available in nature have begun to deteriorate due to environmental pollution                          |                                                                                                                                                | <input type="checkbox"/> Correct<br><input type="checkbox"/> Incorrect<br><input type="checkbox"/> Don't know |                               |                               |                               |                               |                |
| The use of groundwater with boreholes/artesian wells to meet water needs can damage the environment                         |                                                                                                                                                | <input type="checkbox"/> Correct<br><input type="checkbox"/> Incorrect<br><input type="checkbox"/> Don't know |                               |                               |                               |                               |                |
| All Indonesian people have the same right to get water in sufficient quantities and of good quality                         |                                                                                                                                                | <input type="checkbox"/> Correct<br><input type="checkbox"/> Incorrect<br><input type="checkbox"/> Don't know |                               |                               |                               |                               |                |
| The government is obliged to provide drinking water for all Indonesian people                                               |                                                                                                                                                | <input type="checkbox"/> Correct<br><input type="checkbox"/> Incorrect<br><input type="checkbox"/> Don't know |                               |                               |                               |                               |                |
| Waste that is disposed of in water bodies does not affect the production process carried out by the municipal water company |                                                                                                                                                | <input type="checkbox"/> Correct<br><input type="checkbox"/> Incorrect<br><input type="checkbox"/> Don't know |                               |                               |                               |                               |                |
| The community can receive water access from the government for free without being charged a fee                             |                                                                                                                                                | <input type="checkbox"/> Correct<br><input type="checkbox"/> Incorrect<br><input type="checkbox"/> Don't know |                               |                               |                               |                               |                |
| A quality drinking water supply system can be implemented if the community actively participates in the system              |                                                                                                                                                | <input type="checkbox"/> Correct<br><input type="checkbox"/> Incorrect<br><input type="checkbox"/> Don't know |                               |                               |                               |                               |                |
| SECTION V                                                                                                                   |                                                                                                                                                |                                                                                                               |                               |                               |                               |                               |                |
| 1                                                                                                                           | I believe that water quality will affect human health                                                                                          |                                                                                                               |                               |                               |                               |                               |                |
|                                                                                                                             | Strongly disagree                                                                                                                              | <input type="checkbox"/><br>1                                                                                 | <input type="checkbox"/><br>2 | <input type="checkbox"/><br>3 | <input type="checkbox"/><br>4 | <input type="checkbox"/><br>5 | Strongly agree |
| 2                                                                                                                           | I believe that I must participate in the drinking water supply system to meet my daily water needs (bathing, washing, cooking, drinking, etc.) |                                                                                                               |                               |                               |                               |                               |                |

|    | Strongly disagree                                                                                                                                          | <input type="checkbox"/><br>1 | <input type="checkbox"/><br>2 | <input type="checkbox"/><br>3 | <input type="checkbox"/><br>4 | <input type="checkbox"/><br>5 | Strongly agree |
|----|------------------------------------------------------------------------------------------------------------------------------------------------------------|-------------------------------|-------------------------------|-------------------------------|-------------------------------|-------------------------------|----------------|
| 3  | I believe that the solid waste problem will affect the quality of the water I use to meet my daily water needs (bathing, washing, cooking, drinking, etc.) |                               |                               |                               |                               |                               |                |
|    | Strongly disagree                                                                                                                                          | <input type="checkbox"/><br>1 | <input type="checkbox"/><br>2 | <input type="checkbox"/><br>3 | <input type="checkbox"/><br>4 | <input type="checkbox"/><br>5 | Strongly agree |
| 4  | I believe that to get good quality water in sufficient quantities to meet daily needs (bathing, washing, cooking, drinking, etc.) costs money.             |                               |                               |                               |                               |                               |                |
|    | Strongly disagree                                                                                                                                          | <input type="checkbox"/><br>1 | <input type="checkbox"/><br>2 | <input type="checkbox"/><br>3 | <input type="checkbox"/><br>4 | <input type="checkbox"/><br>5 | Strongly agree |
| 5  | I believe community participation is needed in drinking water programs                                                                                     |                               |                               |                               |                               |                               |                |
|    | Strongly disagree                                                                                                                                          | <input type="checkbox"/><br>1 | <input type="checkbox"/><br>2 | <input type="checkbox"/><br>3 | <input type="checkbox"/><br>4 | <input type="checkbox"/><br>5 | Strongly agree |
| 6  | I believe that new water service from community-based supply is superior in term of quality/quantity/affordability compared to my existing water sources   |                               |                               |                               |                               |                               |                |
|    | Strongly disagree                                                                                                                                          | <input type="checkbox"/><br>1 | <input type="checkbox"/><br>2 | <input type="checkbox"/><br>3 | <input type="checkbox"/><br>4 | <input type="checkbox"/><br>5 | Strongly agree |
| 7  | I will dispose of solid waste in its designated place if people around me (family, neighbors, friends) do the same                                         |                               |                               |                               |                               |                               |                |
|    | Strongly disagree                                                                                                                                          | <input type="checkbox"/><br>1 | <input type="checkbox"/><br>2 | <input type="checkbox"/><br>3 | <input type="checkbox"/><br>4 | <input type="checkbox"/><br>5 | Strongly agree |
| 8  | I will dispose of solid waste in its designated place if I get advice from community leaders (religious leaders, heads of neighborhood, etc.)              |                               |                               |                               |                               |                               |                |
|    | Strongly disagree                                                                                                                                          | <input type="checkbox"/><br>1 | <input type="checkbox"/><br>2 | <input type="checkbox"/><br>3 | <input type="checkbox"/><br>4 | <input type="checkbox"/><br>5 | Strongly agree |
| 9  | I will pay the water fees even though the price increases if the people around me (family, neighbors, and friends) do the same.                            |                               |                               |                               |                               |                               |                |
|    | Strongly disagree                                                                                                                                          | <input type="checkbox"/><br>1 | <input type="checkbox"/><br>2 | <input type="checkbox"/><br>3 | <input type="checkbox"/><br>4 | <input type="checkbox"/><br>5 | Strongly agree |
| 10 | I will pay water fees even though the price increases if I get advice from local community leaders (religious leaders, heads of neighborhood, etc.)        |                               |                               |                               |                               |                               |                |
|    | Strongly disagree                                                                                                                                          | <input type="checkbox"/><br>1 | <input type="checkbox"/><br>2 | <input type="checkbox"/><br>3 | <input type="checkbox"/><br>4 | <input type="checkbox"/><br>5 | Strongly agree |
| 11 | I will participate in water supply program if the people around me (family, neighbors, and friends) do the same                                            |                               |                               |                               |                               |                               |                |
|    | Strongly disagree                                                                                                                                          | <input type="checkbox"/><br>1 | <input type="checkbox"/><br>2 | <input type="checkbox"/><br>3 | <input type="checkbox"/><br>4 | <input type="checkbox"/><br>5 | Strongly agree |

|    |                                                                                                                                                                           |                               |                               |                               |                               |                               |                |
|----|---------------------------------------------------------------------------------------------------------------------------------------------------------------------------|-------------------------------|-------------------------------|-------------------------------|-------------------------------|-------------------------------|----------------|
| 12 | I will participate in water supply program if I get advice from local community leaders (religious leaders, heads of neighborhood, etc.)                                  |                               |                               |                               |                               |                               |                |
|    | Strongly disagree                                                                                                                                                         | <input type="checkbox"/><br>1 | <input type="checkbox"/><br>2 | <input type="checkbox"/><br>3 | <input type="checkbox"/><br>4 | <input type="checkbox"/><br>5 | Strongly agree |
| 13 | I will switch to a new water supply service from the community-based supply if the people around me (family, neighbors, and friends) do the same.                         |                               |                               |                               |                               |                               |                |
|    | Strongly disagree                                                                                                                                                         | <input type="checkbox"/><br>1 | <input type="checkbox"/><br>2 | <input type="checkbox"/><br>3 | <input type="checkbox"/><br>4 | <input type="checkbox"/><br>5 | Strongly agree |
| 14 | I will switch to a new water supply service from the community-based supply if I get advice from local community leaders (religious leaders, heads of neighborhood, etc.) |                               |                               |                               |                               |                               |                |
|    | Strongly disagree                                                                                                                                                         | <input type="checkbox"/><br>1 | <input type="checkbox"/><br>2 | <input type="checkbox"/><br>3 | <input type="checkbox"/><br>4 | <input type="checkbox"/><br>5 | Strongly agree |
| 15 | I can provide waste containers at my house to dispose of solid waste in its designated place                                                                              |                               |                               |                               |                               |                               |                |
|    | Strongly disagree                                                                                                                                                         | <input type="checkbox"/><br>1 | <input type="checkbox"/><br>2 | <input type="checkbox"/><br>3 | <input type="checkbox"/><br>4 | <input type="checkbox"/><br>5 | Strongly agree |
| 16 | I will dispose of solid waste in its designated place if there are officers who take away solid waste from my house regularly                                             |                               |                               |                               |                               |                               |                |
|    | Strongly disagree                                                                                                                                                         | <input type="checkbox"/><br>1 | <input type="checkbox"/><br>2 | <input type="checkbox"/><br>3 | <input type="checkbox"/><br>4 | <input type="checkbox"/><br>5 | Strongly agree |
| 17 | I have enough time to participate in water supply programs                                                                                                                |                               |                               |                               |                               |                               |                |
|    | Strongly disagree                                                                                                                                                         | <input type="checkbox"/><br>1 | <input type="checkbox"/><br>2 | <input type="checkbox"/><br>3 | <input type="checkbox"/><br>4 | <input type="checkbox"/><br>5 | Strongly agree |
| 18 | I have enough money to participate in water supply programs                                                                                                               |                               |                               |                               |                               |                               |                |
|    | Strongly disagree                                                                                                                                                         | <input type="checkbox"/><br>1 | <input type="checkbox"/><br>2 | <input type="checkbox"/><br>3 | <input type="checkbox"/><br>4 | <input type="checkbox"/><br>5 | Strongly agree |
| 19 | I will switch to a new water supply service from the community-based supply if the quality/quantity were acceptable or if it were affordable                              |                               |                               |                               |                               |                               |                |
|    | Strongly disagree                                                                                                                                                         | <input type="checkbox"/><br>1 | <input type="checkbox"/><br>2 | <input type="checkbox"/><br>3 | <input type="checkbox"/><br>4 | <input type="checkbox"/><br>5 | Strongly agree |
| 20 | I will not throw garbage or waste into water bodies                                                                                                                       |                               |                               |                               |                               |                               |                |
|    | Strongly disagree                                                                                                                                                         | <input type="checkbox"/><br>1 | <input type="checkbox"/><br>2 | <input type="checkbox"/><br>3 | <input type="checkbox"/><br>4 | <input type="checkbox"/><br>5 | Strongly agree |
| 21 | I will pay water retribution even though the tariff increases                                                                                                             |                               |                               |                               |                               |                               |                |
|    | Strongly disagree                                                                                                                                                         | <input type="checkbox"/><br>1 | <input type="checkbox"/><br>2 | <input type="checkbox"/><br>3 | <input type="checkbox"/><br>4 | <input type="checkbox"/><br>5 | Strongly agree |
| 22 | I will participate in water supply program, in-kind or in cash                                                                                                            |                               |                               |                               |                               |                               |                |

|    |                                                                                                            |                               |                               |                               |                               |                               |                |  |
|----|------------------------------------------------------------------------------------------------------------|-------------------------------|-------------------------------|-------------------------------|-------------------------------|-------------------------------|----------------|--|
|    | Strongly disagree                                                                                          | <input type="checkbox"/><br>1 | <input type="checkbox"/><br>2 | <input type="checkbox"/><br>3 | <input type="checkbox"/><br>4 | <input type="checkbox"/><br>5 | Strongly agree |  |
| 23 | I will switch to a new water supply service from the community-based supply if such sources were available |                               |                               |                               |                               |                               |                |  |
|    | Strongly disagree                                                                                          | <input type="checkbox"/><br>1 | <input type="checkbox"/><br>2 | <input type="checkbox"/><br>3 | <input type="checkbox"/><br>4 | <input type="checkbox"/><br>5 | Strongly agree |  |

## SECTION VI

How many Rupiah you spend per month for water?

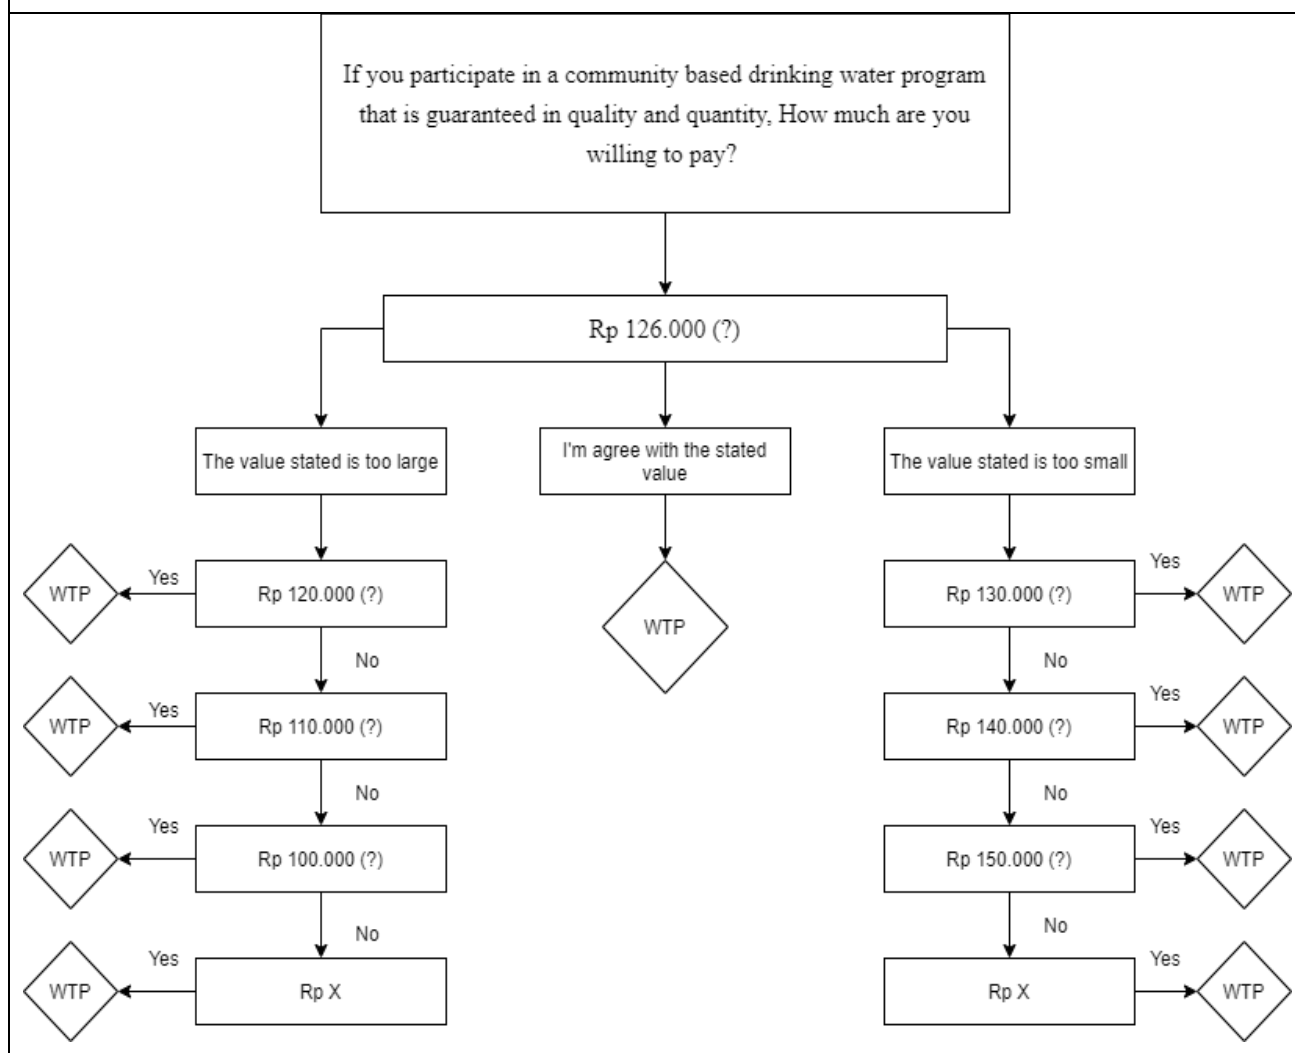

Supplement: s1 [file s1]
